# Supplementary material for: Fate of endocrine disruptor compounds in an anaerobic membrane bioreactor (AnMBR) coupled to an activated sludge reactor
Source: Royal Society of Chemistry journal article supplement (doi:10.1039/c7ew00382j), 2017-11-29
Supplement: c7ew00382j1.pdf [file c7ew00382j1.pdf]

## Supplementary material:

### Fate of Endocrine Disruptor Compounds in an Anaerobic Membrane BioReactor

(AnMBR) coupled to an activated sludge reactor.

**SM1.** Water solubility and log K<sub>ow</sub> of studied compounds.

| Compound              | log K <sub>ow</sub> | Water Solubility<br>(mg/L; 20 °C) |
|-----------------------|---------------------|-----------------------------------|
| Octylphenol           | 4.9                 | 7.0                               |
| Technical nonylphenol | 5.7                 | 4.9                               |
| 4-n-nonylphenol       | 5.8                 | 6.0                               |
| Bisphenol-A           | 3.6                 | 120.0                             |
| Pentachlorophenol     | 4.7                 | 15.0                              |
| Estrone               | 3.6                 | 1.3                               |
| 17β-estradiol         | 3.8                 | 1.5                               |
| 17α-ethinylestradiol  | 4.0                 | 9.2                               |

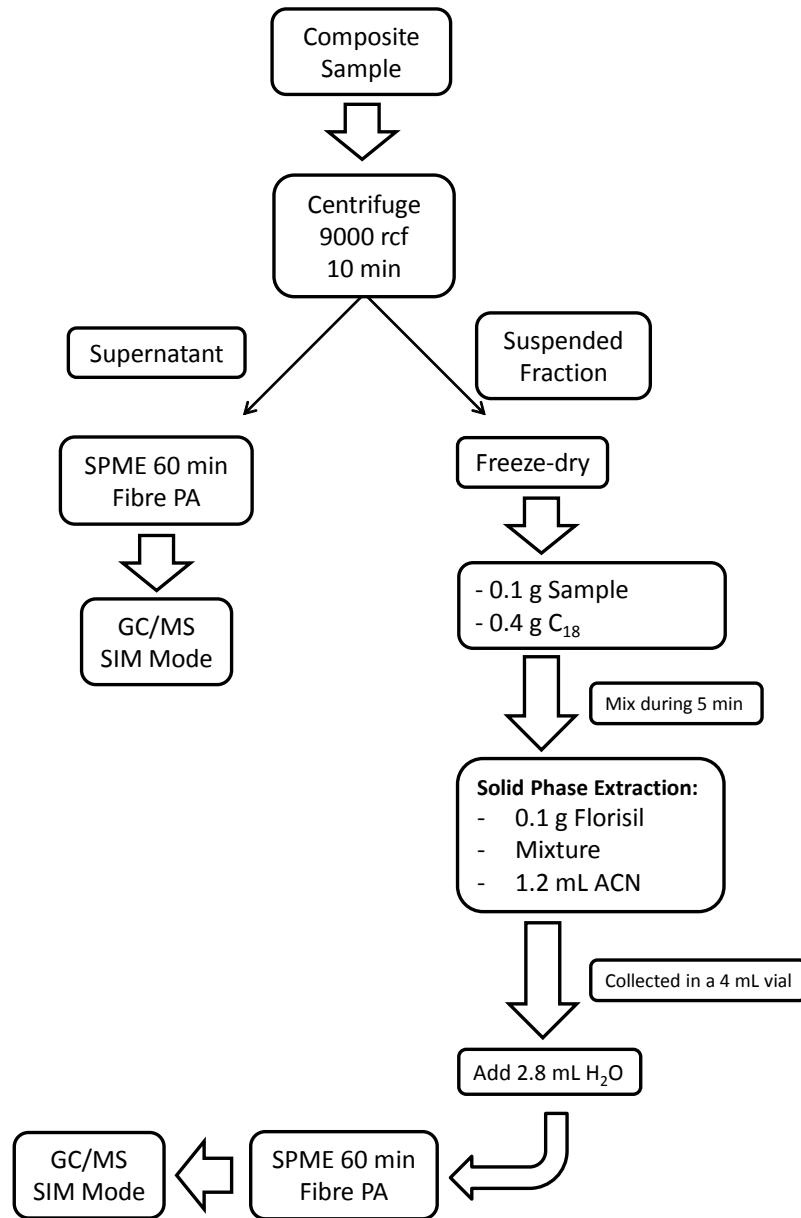

**SM2.** Scheme of the method used for soluble and suspended fractions analysis.

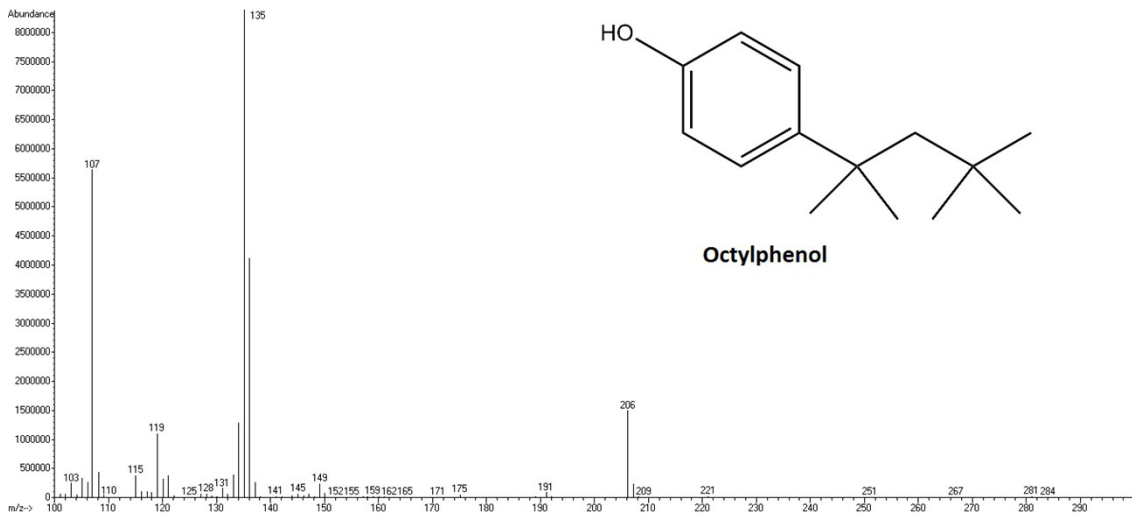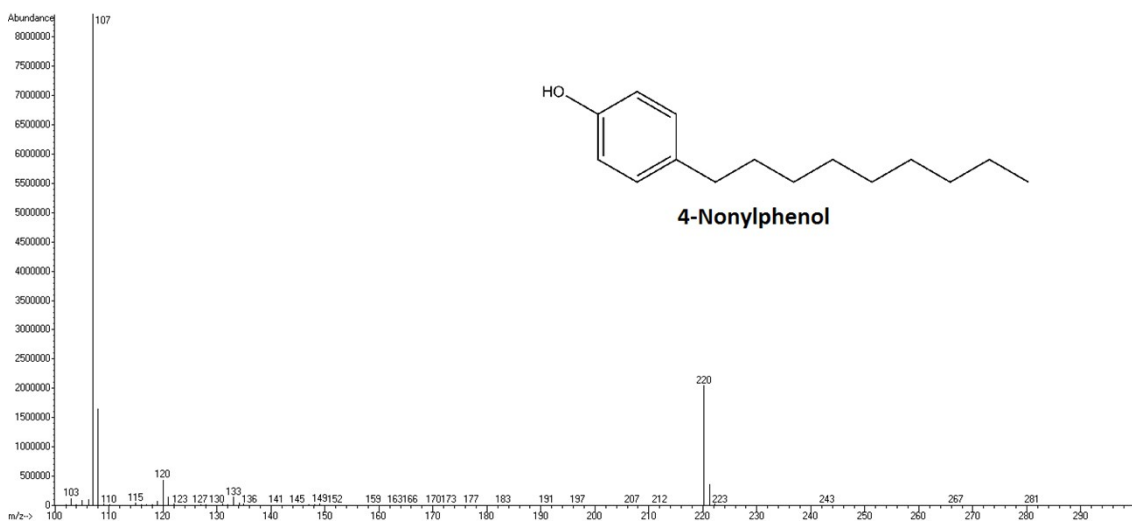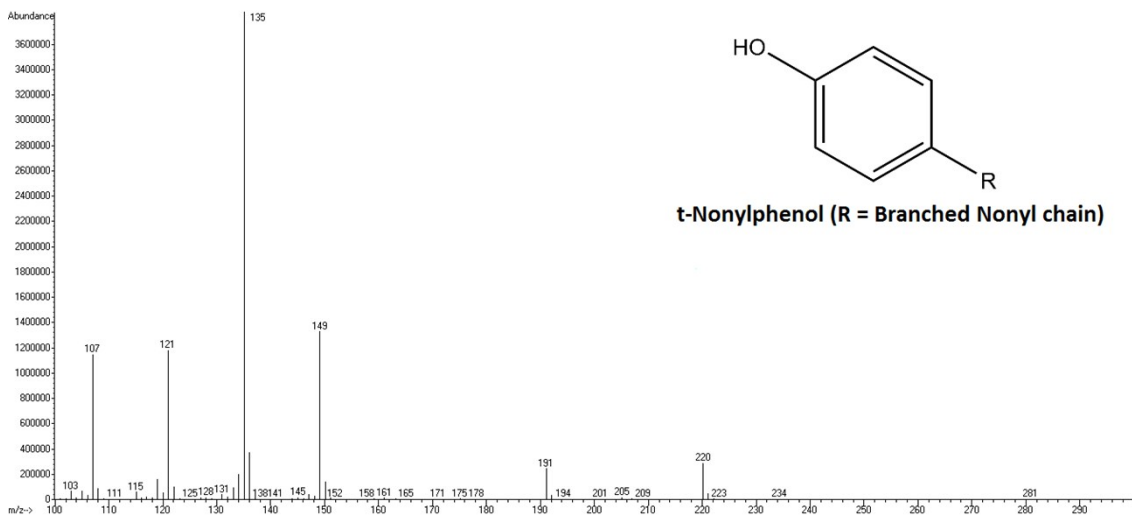

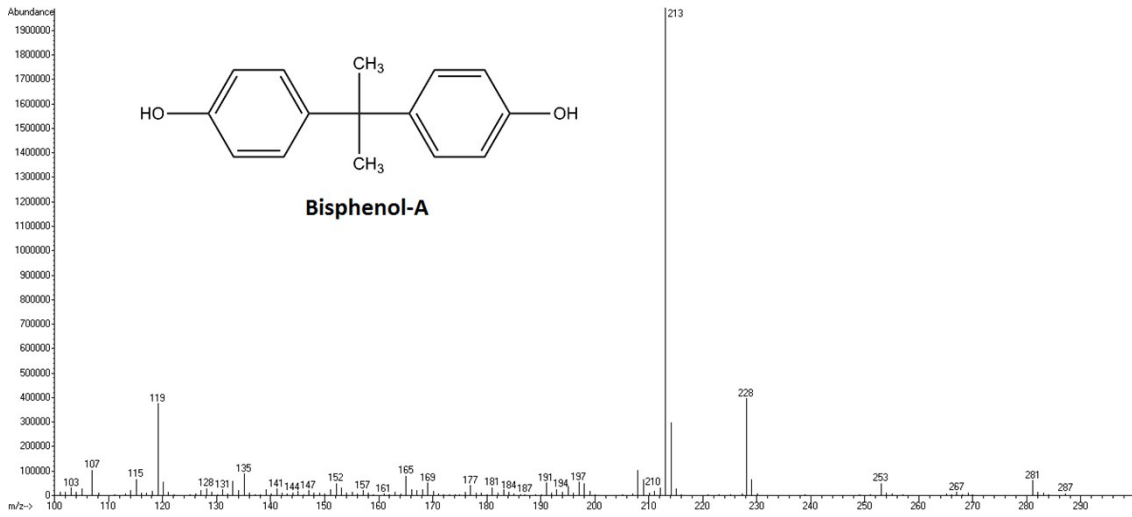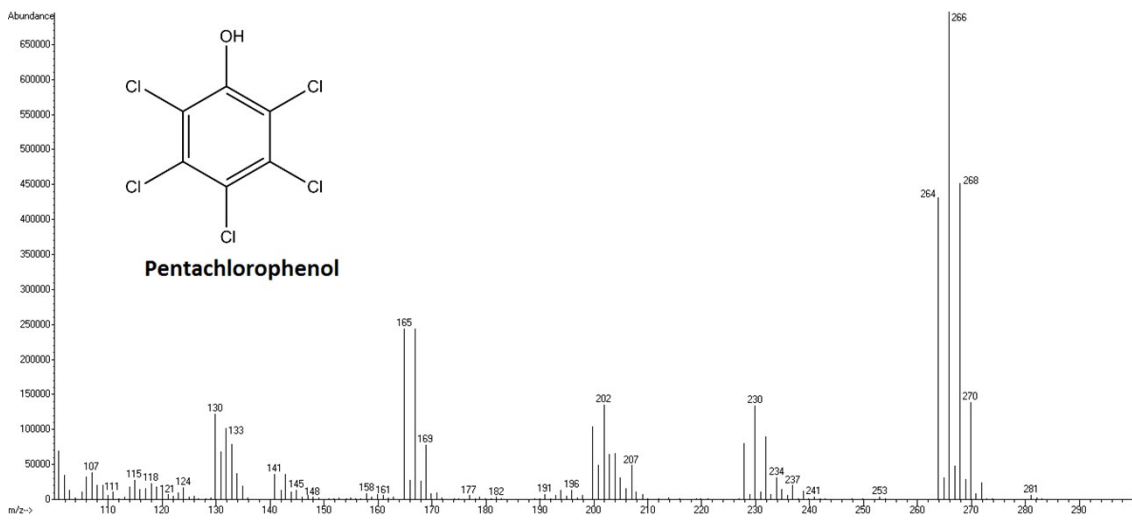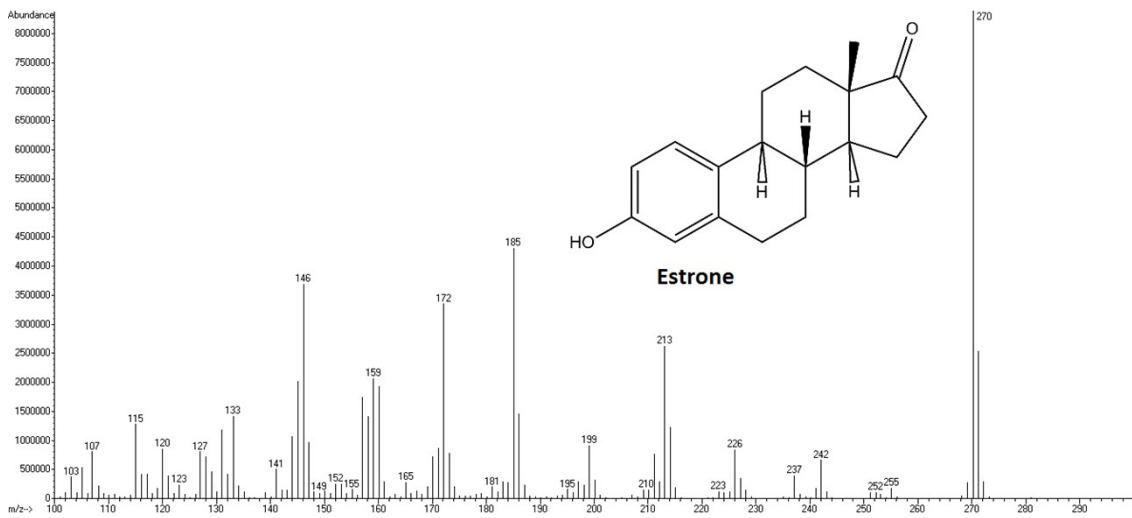

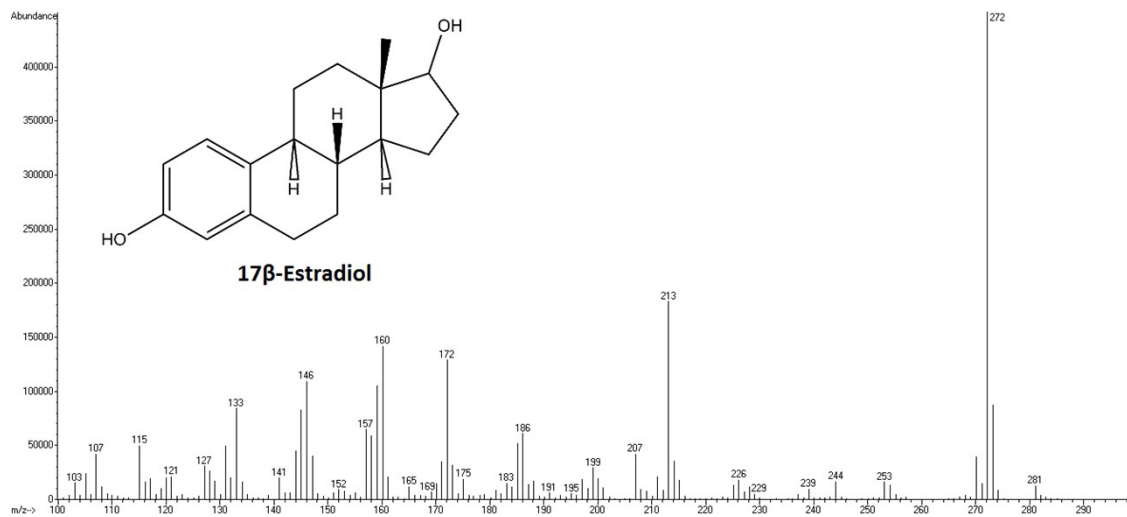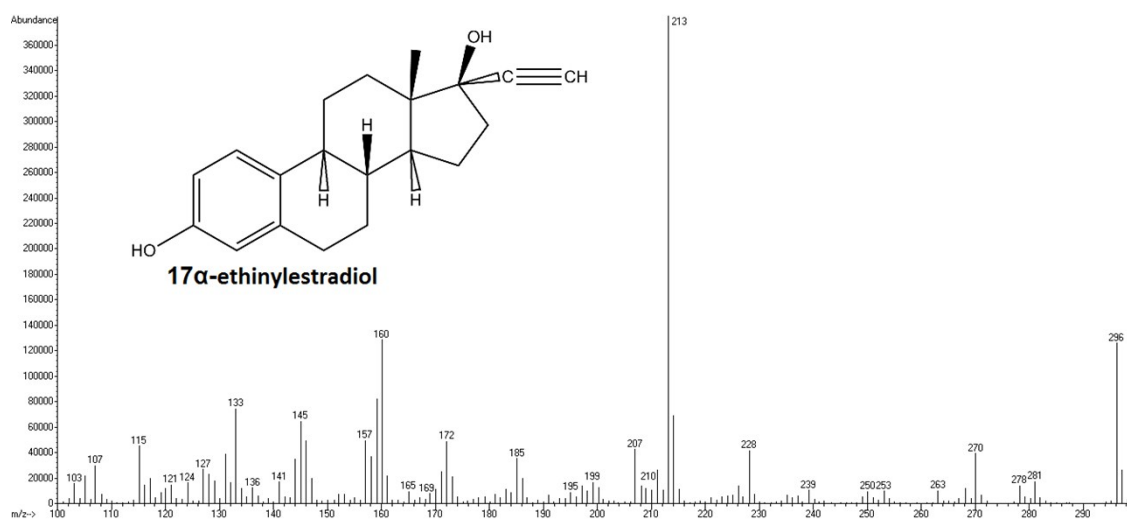

**SM3.** Mass spectra in scan mode (work range from 100 to 300 m/z) for OP, 4-NP, t-NP, BPA, PCP, E1, E2 and EE2 at 5 µg/L each one.

| EDC  | LOD (ng/L) | LOQ (ng/kg) | $a \pm s_a$                | $b \pm s_b$                  | $r^2$ | Range (ng/L) | RSD(%) |
|------|------------|-------------|----------------------------|------------------------------|-------|--------------|--------|
| OP   | 2          | 7           | $(-18 \pm 4) \times 10^5$  | $(11 \pm 5) \times 10^3$     | 0.990 | 2 - 6000     | 18     |
| t-NP | 25         | 83          | $(-6 \pm 2) \times 10^6$   | $(5.0 \pm 0.2) \times 10^3$  | 0.990 | 25 - 50000   | 18     |
| 4-NP | 8          | 27          | $(-8 \pm 3) \times 10^6$   | $(12.1 \pm 0.5) \times 10^3$ | 0.995 | 5 - 10000    | 20     |
| BPA  | 500        | 1667        | $(-4 \pm 2) \times 10^5$   | $(4.4 \pm 0.2) \times 10^2$  | 0.990 | 500 - 50000  | 16     |
| PCP  | 600        | 2000        | $(-1 \pm 3) \times 10^6$   | $(1.1 \pm 0.1) \times 10^3$  | 0.991 | 500 - 50000  | 17     |
| E1   | 200        | 667         | $(-20 \pm 16) \times 10^4$ | $74 \pm 9$                   | 0.990 | 200 - 100000 | 18     |
| E2   | 300        | 1000        | $(-14 \pm 8) \times 10^4$  | $44 \pm 5$                   | 0.991 | 200 - 100000 | 13     |
| EE2  | 300        | 1000        | $(-15 \pm 4) \times 10^4$  | $68 \pm 2$                   | 0.993 | 200 - 100000 | 14     |

**SM4.** Analytical parameters obtained for the target analytes with SPME/GC/MS for the soluble fraction. LOD, calibration line parameters (where “a” is y-intercept and “b” is slope), correlation coefficient ( $r^2$ ), linear dynamic range and intra-day precision (RSD) are shown.

| EDC  | LOD (ng/kg) | LOQ (ng/kg) | $a \pm s_a$                 | $b \pm s_b$                  | $r^2$ | Range (ng/kg) | RSD(%) |
|------|-------------|-------------|-----------------------------|------------------------------|-------|---------------|--------|
| OP   | 20          | 67          | $(-20 \pm 8) \times 10^5$   | $(14 \pm 1) \times 10^3$     | 0.997 | 20 - 6000     | 17     |
| t-NP | 110         | 367         | $(-6 \pm 5) \times 10^6$    | $(6.4 \pm 0.5) \times 10^3$  | 0.996 | 100 - 50000   | 15     |
| 4-NP | 30          | 100         | $(-11 \pm 4) \times 10^6$   | $(16.0 \pm 0.8) \times 10^3$ | 0.990 | 30 - 10000    | 18     |
| BPA  | 1000        | 3333        | $(2.6 \pm 0.9) \times 10^6$ | $(7 \pm 1) \times 10^3$      | 0.990 | 1000 - 50000  | 12     |
| PCP  | 1000        | 3333        | $(-5 \pm 4) \times 10^6$    | $(1.4 \pm 0.1) \times 10^3$  | 0.994 | 1000 - 50000  | 16     |
| E1   | 400         | 1333        | $(-5 \pm 3) \times 10^5$    | $(2.0 \pm 0.2) \times 10^2$  | 0.995 | 400 - 100000  | 15     |
| E2   | 600         | 2000        | $(-2 \pm 1) \times 10^5$    | 96 ± 8                       | 0.996 | 600 - 100000  | 18     |
| EE2  | 600         | 2000        | $(-4 \pm 4) \times 10^5$    | $(2.0 \pm 0.3) \times 10^2$  | 0.992 | 600 - 100000  | 19     |

**SM5.** Analytical parameters obtained for the target analytes with SPME/GC/MS for the suspended fraction. LOD, calibration line parameters (where “a” is y-intercept and “b” is slope), correlation coefficient ( $r^2$ ), linear dynamic range and intra-day precision (RSD) are shown.
